# Supplementary material for: Engineering tin phosphides@carbon yolk–shell nanocube structures as a highly stable anode material for sodium-ion batteries
Source: Royal Society of Chemistry journal article supplement (doi:10.1039/c7ta04900e), 2017-01-01
Supplement: c7ta04900e1.pdf [file c7ta04900e1.pdf]

This ESI for *J. Mater. Chem. A*, 2017, 5, 16994-17000, originally published on 21<sup>st</sup> July 2017, was updated on 17<sup>th</sup> December 2018. The order of Fig. S2-S4 has been changed; the fitting curve was added to Fig. S4, an error in the Y-axis label of Fig. S5b has been corrected and the Y-axis scale adjusted.

## Supporting Information for:

### Engineering Tin Phosphides@Carbon Yolk-Shell Nanocube Structures as a Highly Stable Anode Material for Sodium-Ion Batteries

Lianbo Ma,<sup>†‡\*</sup> Pengjie Yan,<sup>‡</sup> Shikui Wu,<sup>‡<sup>†</sup></sup> Guoyin Zhu,<sup>†\*</sup> Yalong Shen,<sup>‡<sup>⊥\*</sup></sup>

<sup>†</sup> Key Laboratory of Mesoscopic Chemistry of MOE, School of Chemistry and Chemical Engineering, Nanjing University, Nanjing, 210093, China.

E-mail: [mlb8976@126.com](mailto:mlb8976@126.com) (L. Ma); [zhuguoyin2008@126.com](mailto:zhuguoyin2008@126.com) (G. Zhu)

<sup>‡</sup> School of Chemistry and Chemical Engineering, Jiangsu University, Zhenjiang 212013, PR China.

<sup>†</sup> College of Pharmacy, Inner Mongolia Medical University, Hohhot 010059, PR China.

<sup>⊥</sup> MIIT Key Laboratory of Advanced Display Materials and Devices, Institute of Optoelectronics & Nanomaterials, College of Materials Science and Engineering, Nanjing University of Science and Technology, Nanjing, Jiangsu, 210094, China.

[shenyalong@njust.edu.cn](mailto:shenyalong@njust.edu.cn) (Y. Shen)

**Figure S1-S8**

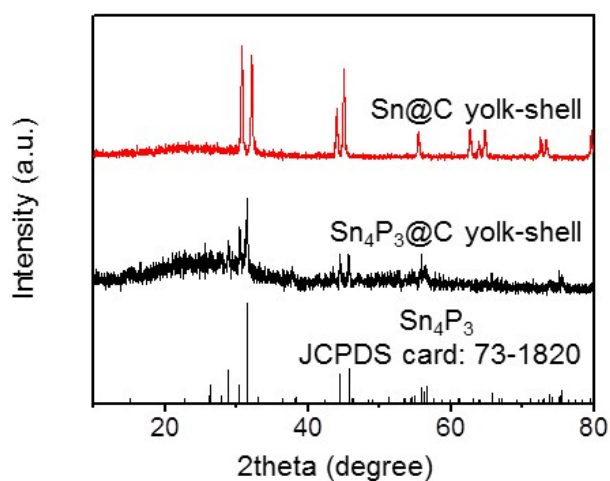

**Fig. S1.** X-ray diffraction (XRD) patterns of Sn@C and Sn<sub>4</sub>P<sub>3</sub>@C yolk-shell nanocubes. The XRD pattern of Sn<sub>4</sub>P<sub>3</sub>@C yolk-shell nanocubes is in good agreement with the standard JCPDS card (No. 73-1820).

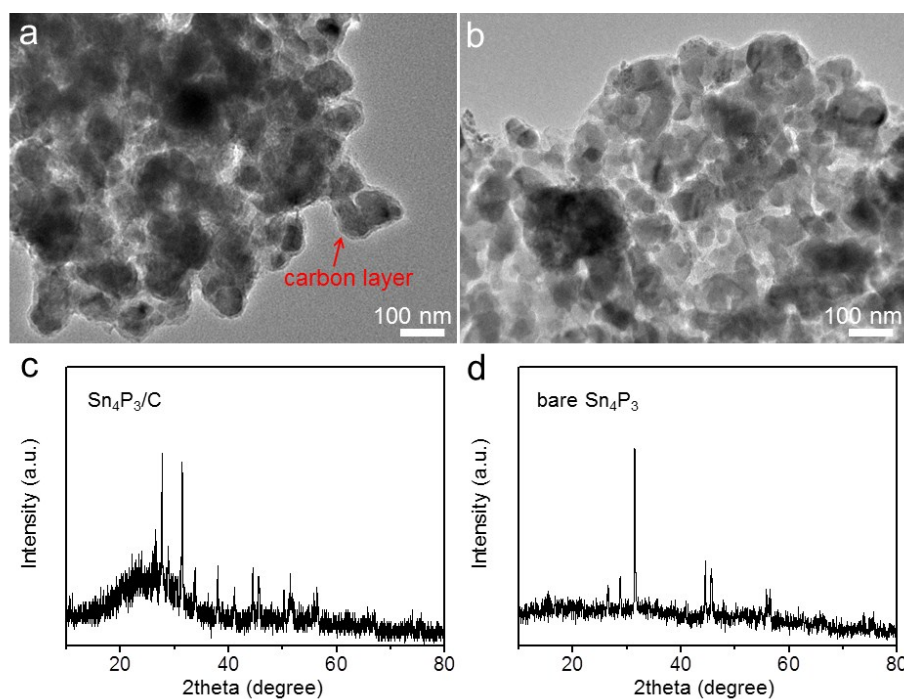

**Fig. S2.** Morphology and composition characterizations of Sn<sub>4</sub>P<sub>3</sub>/C and bare Sn<sub>4</sub>P<sub>3</sub> as the control samples. (a) TEM image and (c) XRD pattern of Sn<sub>4</sub>P<sub>3</sub>/C material. (b) TEM image and (d) XRD pattern of bare Sn<sub>4</sub>P<sub>3</sub>.

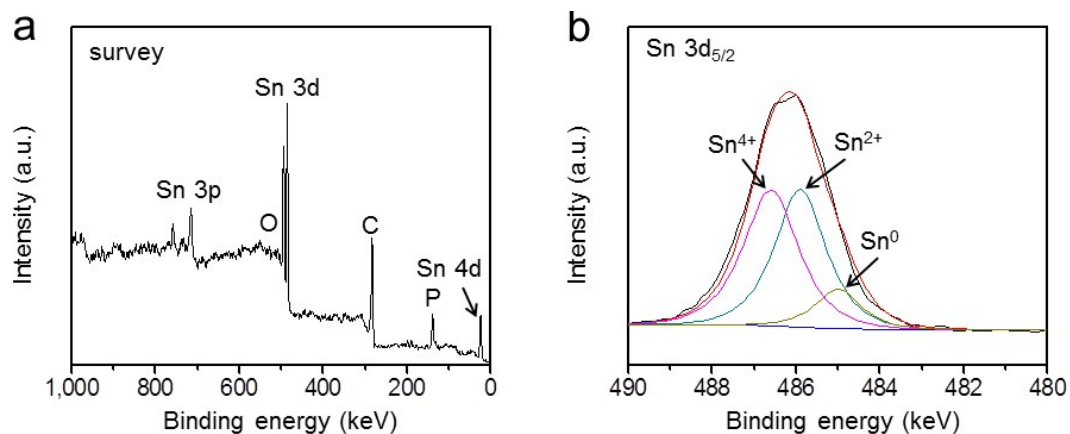

**Fig. S3.** X-ray photoelectron spectra (XPS) result of Sn<sub>4</sub>P<sub>3</sub>@C yolk-shell nanocubes. (a) Survey XPS of Sn<sub>4</sub>P<sub>3</sub>@C yolk-shell nanocubes and (b) the XPS result at Sn 3d<sub>5/2</sub> region. The survey XPS discloses the co-existence of C, Sn and P elements. The Sn 3d<sub>5/2</sub> region suggests the preparation of Sn<sub>4</sub>P<sub>3</sub>.

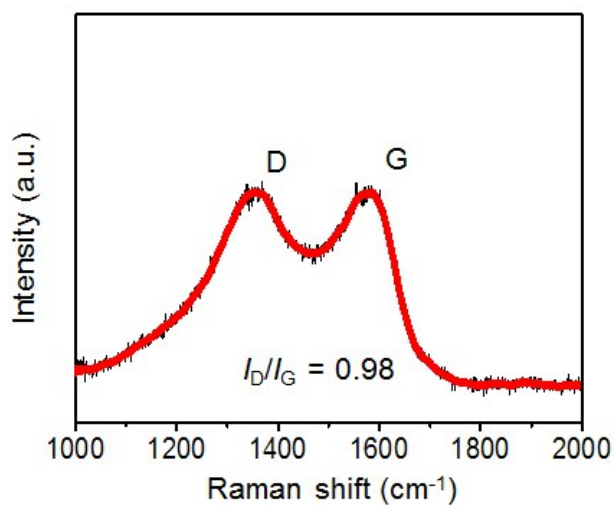

**Fig. S4.** Raman spectrum of the Sn<sub>4</sub>P<sub>3</sub>@C yolk-shell nanocubes, revealing the existence of carbon material with moderate graphitic degree.

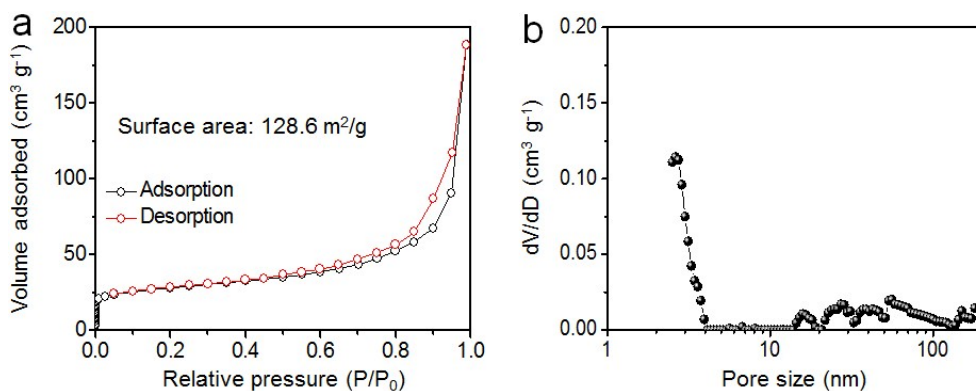

**Fig. S5.** Surface area and pore size characteristics of Sn<sub>4</sub>P<sub>3</sub>@C yolk-shell nanocubes. (a) N<sub>2</sub> adsorption-desorption isotherm and (b) pore size distribution of Sn<sub>4</sub>P<sub>3</sub>@C yolk-shell nanocubes.

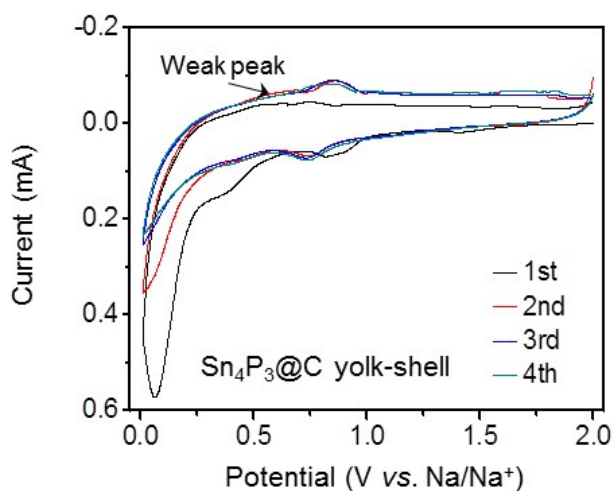

**Fig. S6.** CV curves of Sn<sub>4</sub>P<sub>3</sub>@C yolk-shell nanocubes at the scan rate of 0.2 mV s<sup>-1</sup> within the potential range of 0.01–2.0 V vs. Na/Na<sup>+</sup>.

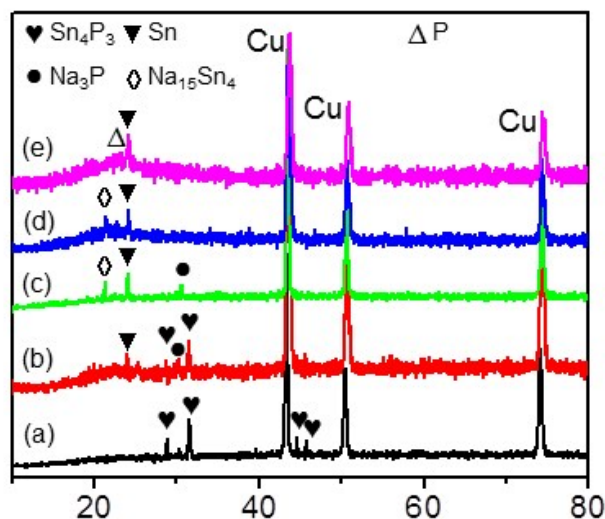

**Fig. S7.** *Ex-situ* XRD patterns of the  $\text{Sn}_4\text{P}_3@\text{C}$  yolk-shell nanocube electrodes at different charge/discharge states: (a) fresh electrode, (b) after first discharge to 0.5 V, (c) after first discharge to 0.01 V, (d) after first charge to 0.5 V, and (e) after first full charge to 2.0 V.

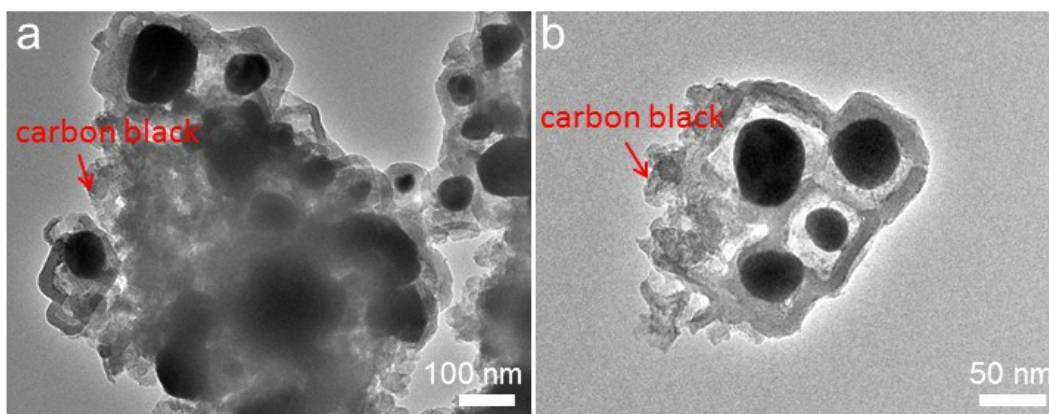

**Fig. S8.** Morphology of  $\text{Sn}_4\text{P}_3@\text{C}$  yolk-shell nanocubes after the electrochemical tests. (a,b) TEM images of  $\text{Sn}_4\text{P}_3@\text{C}$  yolk-shell nanocubes after cycling at  $2.0 \text{ A g}^{-1}$ , showing that the  $\text{Sn}_4\text{P}_3$  particles were thoroughly encapsulated into the carbon nanocubes, indicating the highly structural integrity.
